# Supplementary material for: Technical note: A theoretical study on the mechanism of citric acid-driven multi-component nucleation of sulfuric acid-base-water clusters
Source: Copernicus journal article supplement (doi:10.5194/egusphere-2023-3113), 2024-02-21
Supplement: Supplementary file 1 [file egusphere-2023-3113-supplement.pdf]

# A theoretical study on the mechanism of citric acid-driven multi-component nucleation of sulfuric acid-base-water clusters

Xiaoli Gong<sup>1,2</sup>, Liyao Zhu<sup>1</sup>, Renyi Zhang<sup>3</sup>

<sup>1</sup>Electronics and Information College, Hangzhou Dianzi University, Hangzhou 310018, China

5 <sup>2</sup>Institute of Carbon Neutrality and New Energy, Hangzhou Dianzi University, Hangzhou 310018, China

<sup>3</sup>Department of Atmospheric Sciences and Department of Chemistry, Texas A&M University, College Station, TX 77843, USA.

Correspondence to: Xiaoli Gong ([gxl@hdu.edu.cn](mailto:gxl@hdu.edu.cn)) and Renyi Zhang ([renyi-zhang@geos.tamu.edu](mailto:renyi-zhang@geos.tamu.edu))

Table S1. The number and length of hydrogen bonds in Å in all clusters.

10

| cluster                                     | Number of water molecules                             |                                                             |                                                                         |                                                                                            |                                                                                            |
|---------------------------------------------|-------------------------------------------------------|-------------------------------------------------------------|-------------------------------------------------------------------------|--------------------------------------------------------------------------------------------|--------------------------------------------------------------------------------------------|
|                                             | 0                                                     | 1                                                           | 2                                                                       | 3                                                                                          | 4                                                                                          |
| SA·AM·<br>W <sub>n</sub> (n = 0<br>- 4)     | 1<br><b>(1.539)</b>                                   | 3<br><b>(1.563,1.719,2<br/>.067)</b>                        | 5<br><b>(1.725,1.732,1.79<br/>4,1.799,1.933)</b>                        | 6<br><b>(1.708,1.720,1.723,1.7<br/>94,1.903,1.998)</b>                                     | 7<br><b>(1.633,1.758,1.796,1.831,1<br/>.854,1.961,1.980)</b>                               |
| SA·AM·C<br>A·W <sub>n</sub> (n =<br>0 - 4)  | 4<br><b>(1.450,1.457<br/>,1.913,2.146<br/>)</b>       | 6<br><b>(1.659,1.703,1<br/>.757,1.789,1.8<br/>58,1.935)</b> | 8<br><b>(1.584,1.883,1.88<br/>9,1.917,2.044,2.0<br/>64,2.073,2.121)</b> | 11<br><b>(1.686,1.695,1.714,1.7<br/>39,1.897,1.917,1.926,1.<br/>945,1.959,1.961,1.969)</b> | 11<br><b>(1.582,1.666,1.783,1.834,1<br/>.857,1.884,1.920,1.929,1.9<br/>47,1.958,2.002)</b> |
| SA·DMA·<br>W <sub>n</sub> (n = 0<br>- 4)    | 1<br><b>(1.392)</b>                                   | 3<br><b>(1.569,1.803,1<br/>.868)</b>                        | 4<br><b>(1.710,1.735,1.79<br/>1,2.021)</b>                              | 6<br><b>(1.738,1.785,1.809,1.9<br/>25,1.939,2.003)</b>                                     | 8<br><b>(1.694,1.700,1.724,1.748,1<br/>.870,1.904,1.928,1.943)</b>                         |
| SA·DMA·<br>CA·W <sub>n</sub> (n<br>= 0 - 4) | 5<br><b>(1.643,1.770<br/>,2.030,2.041<br/>,2.152)</b> | 5<br><b>(1.466,1.676,1<br/>.774,1.838,1.9<br/>83)</b>       | 7<br><b>(1.548,1.770,1.77<br/>8,1.965,2.003,2.0<br/>88,2.088)</b>       | 8<br><b>(1.629,1.698,1.738,1.7<br/>47,1.844,1.849,1.974,<br/>2.110)</b>                    | 9<br><b>(1.502,1.654,1.780,1.853,1<br/>.862,1.889,1.929,1.968,1.9<br/>73)</b>              |
| SA·AM·D<br>MA·W <sub>n</sub> (n<br>= 0 - 4) | 2<br><b>(1.586,1.792<br/>)</b>                        | 4<br><b>(1.531,1.684,1<br/>.812,1.878)</b>                  | 5<br><b>(1.712,1.813,2.02<br/>4,2.077,2.157)</b>                        | 7<br><b>(1.688,1.689,1.698,1.7<br/>04,1.889,1.966,1.985)</b>                               | 8<br><b>(1.659,1.718,1.767,1.849,1<br/>.863,1.916,1.938,1.989)</b>                         |
| SA·AM·D<br>MA·CA·                           | 4<br><b>(1.45,1.567,<br/>)</b>                        | 6<br><b>(1.581,1.634,1<br/>)</b>                            | 9<br><b>(1.516,1.647,1.72<br/>)</b>                                     | 10<br><b>(1.593,1.670,1.670,1.7<br/>)</b>                                                  | 8<br><b>(1.587,1.602,1.735,1.768,1<br/>)</b>                                               |

|                       |                   |                             |                                      |                                             |                         |
|-----------------------|-------------------|-----------------------------|--------------------------------------|---------------------------------------------|-------------------------|
| $W_n$ ( $n = 0 - 4$ ) | 1.703 ,<br>1.791) | .780,1.785,1.8<br>64,1.957) | 6,1.791,1.817,1.8<br>29,1.854,1.972) | 95,1.800,1.905,1.906,1.<br>979,2.077,2.098) | .805,1.857,1.899,1.963) |
|-----------------------|-------------------|-----------------------------|--------------------------------------|---------------------------------------------|-------------------------|

Table S2. The number of proton transfers in all clusters.

| cluster                             | Number of water molecules |   |   |   |   |
|-------------------------------------|---------------------------|---|---|---|---|
|                                     | 0                         | 1 | 2 | 3 | 4 |
| SA·AM· $W_n$ ( $n = 0 - 4$ )        | 0                         | 0 | 1 | 1 | 1 |
| SA·AM·CA· $W_n$ ( $n = 0 - 4$ )     | 1                         | 1 | 1 | 1 | 1 |
| SA·DMA· $W_n$ ( $n = 0 - 4$ )       | 1                         | 1 | 1 | 1 | 1 |
| SA·DMA·CA· $W_n$ ( $n = 0 - 4$ )    | 1                         | 1 | 1 | 1 | 1 |
| SA·AM·DMA· $W_n$ ( $n = 0 - 4$ )    | 1                         | 1 | 1 | 1 | 1 |
| SA·AM·DMA·CA· $W_n$ ( $n = 0 - 4$ ) | 1                         | 1 | 2 | 1 | 1 |

Table S3. The contribution of CA in the formation of hydrogen bonds in all clusters.

15

| cluster                         |               | Donor                     | Acceptor                  | Hydrogen bond | Hydrogen bond length/Å |
|---------------------------------|---------------|---------------------------|---------------------------|---------------|------------------------|
| SA·AM·CA· $W_n$ ( $n = 0 - 4$ ) | n=0           | <b>β-COOH</b>             | SA                        | C-O-H···O=S   | 1.457                  |
|                                 |               | SA                        | <b>β-COOH</b>             | S=O-H···O=C   | 1.913                  |
|                                 |               | AM                        | <b>α<sub>1</sub>-COOH</b> | N-H···O=C     | 2.146                  |
|                                 | n=1           | <b>α<sub>1</sub>-COOH</b> | SA                        | C-O-H···O=S   | 1.757                  |
|                                 |               | AM                        | <b>α<sub>1</sub>-COOH</b> | N-H···O=C     | 1.858                  |
|                                 |               | <b>β-COOH</b>             | W                         | C-O-H···O-H   | 1.659                  |
|                                 |               | AM                        | <b>β-COOH</b>             | N-H···O=C     | 1.935                  |
|                                 | n=2           | <b>α<sub>1</sub>-COOH</b> | W                         | C-O-H···O-H   | 1.584                  |
|                                 |               | AM                        | <b>α<sub>1</sub>-COOH</b> | N-H···O=C     | 2.073                  |
|                                 |               | AM                        | <b>β-COOH</b>             | N-H···O=C     | 2.044                  |
|                                 | n=3           | <b>β-OH</b>               | <b>α<sub>1</sub>-COOH</b> | C-O-H···O=C   | 1.897                  |
|                                 |               | SA                        | <b>β-OH</b>               | S=O-H···O-C   | 1.959                  |
|                                 |               | <b>β-COOH</b>             | SA                        | C-O-H···O=S   | 1.686                  |
|                                 |               | AM                        | <b>β-COOH</b>             | N-H···O=C     | 1.917                  |
| n=4                             | <b>β-COOH</b> | SA                        | C-O-H···O=S               | 1.582         |                        |

|                                      |                                            |                  |                  |             |             |
|--------------------------------------|--------------------------------------------|------------------|------------------|-------------|-------------|
|                                      |                                            | W                | $\beta$ -COOH    | O-H...O=C   | 2.002       |
|                                      |                                            | W                | $\alpha_1$ -COOH | O-H...O=C   | 1.929       |
| SA·DMA·CA·W <sub>n</sub> (n = 0 - 4) | n=0                                        | $\alpha_1$ -COOH | SA               | C-O-H...O=S | 1.643       |
|                                      |                                            | DMA              | $\alpha_1$ -COOH | N-H...O=C   | 2.152       |
|                                      |                                            | $\beta$ -COOH    | SA               | C-O-H...O=S | 2.030       |
|                                      |                                            | DMA              | $\beta$ -COOH    | N-H...O=C   | 2.041       |
|                                      | n=1                                        | $\alpha_1$ -COOH | SA               | C-O-H...O=S | 1.466       |
|                                      |                                            | DMA              | $\alpha_1$ -COOH | N-H...O=C   | 1.774       |
|                                      |                                            | W                | $\beta$ -OH      | O-H...O-C   | 1.983       |
|                                      | n=2                                        | $\alpha_1$ -COOH | W                | C-O-H...O-H | 1.778       |
|                                      |                                            | W                | $\alpha_1$ -COOH | O-H...O=C   | 2.003       |
|                                      |                                            | W                | $\alpha_2$ -COOH | O-H...O=C   | 1.965       |
|                                      |                                            | $\beta$ -COOH    | SA               | C-O-H...O=S | 1.548       |
|                                      |                                            | DMA              | $\beta$ -COOH    | N-H...O=C   | 2.088       |
|                                      | n=3                                        | $\alpha_1$ -COOH | W                | C-O-H...O-H | 1.698       |
|                                      |                                            | DMA              | $\alpha_1$ -COOH | N-H...O=C   | 2.110       |
|                                      |                                            | $\beta$ -COOH    | W                | C-O-H...O-H | 1.629       |
|                                      |                                            | W                | $\beta$ -COOH    | O-H...O=C   | 1.849       |
|                                      | n=4                                        | $\alpha_1$ -COOH | SA               | C-O-H...O=S | 1.502       |
|                                      |                                            | SA               | $\alpha_1$ -COOH | S=O-H...O=C | 1.862       |
|                                      |                                            | W                | $\beta$ -OH      | O-H...O-C   | 1.889       |
|                                      | SA·AM·DMA·CA·W <sub>n</sub><br>(n = 0 - 4) | n=0              | $\alpha_1$ -COOH | SA          | C-O-H...O=S |
| DMA                                  |                                            |                  | $\alpha_1$ -COOH | N-H...O=C   | 1.791       |
| n=1                                  |                                            | $\alpha_1$ -COOH | SA               | C-O-H...O=S | 1.581       |
|                                      |                                            | DMA              | $\alpha_1$ -COOH | N-H...O-C   | 1.957       |
|                                      |                                            | $\alpha_2$ -COOH | SA               | C-O-H...O=S | 1.780       |
|                                      |                                            | $\beta$ -OH      | SA               | C-O-H...O=S | 1.785       |
| n=2                                  |                                            | DMA              | $\alpha_1$ -COOH | N-H...O-C   | 1.516       |
|                                      |                                            | $\beta$ -OH      | $\alpha_1$ -COOH | C-O-H...O-C | 1.647       |
|                                      |                                            | AM               | $\beta$ -OH      | N-H...O-C   | 1.829       |
|                                      |                                            | $\alpha_2$ -COOH | SA               | C-O-H...O=S | 1.726       |
|                                      |                                            | W                | $\alpha_1$ -COOH | O-H...O=C   | 1.972       |

|  |     |                  |                  |                    |       |
|--|-----|------------------|------------------|--------------------|-------|
|  | n=3 | $\alpha_1$ -COOH | AM               | C-O-H $\cdots$ N-H | 1.670 |
|  |     | W                | $\alpha_1$ -COOH | O-H $\cdots$ O=C   | 1.905 |
|  |     | $\alpha_2$ -COOH | W                | C-O-H $\cdots$ O-H | 1.800 |
|  |     | W                | $\alpha_2$ -COOH | O-H $\cdots$ O=C   | 1.979 |
|  |     | $\beta$ -COOH    | SA               | C-O-H $\cdots$ O=S | 1.593 |
|  |     | SA               | $\beta$ -COOH    | S=O-H $\cdots$ O=C | 1.670 |
|  | n=4 | $\alpha_1$ -COOH | W                | C-O-H $\cdots$ O-H | 1.587 |
|  |     | W                | $\alpha_2$ -COOH | O-H $\cdots$ O=C   | 1.963 |

Table S4 The reaction Gibbs free energies (Kcal mol<sup>-1</sup>) of SA·AM·W<sub>n</sub>·CA<sub>m</sub> (n = 0 - 4, m=0-1), SA·DMA·W<sub>n</sub>·CA<sub>m</sub> (n = 0 - 4, m=0-1) and SA·AM·DMA·W<sub>n</sub>·CA<sub>m</sub> (n = 0 - 4, m=0-1) clusters through various formation manners using M06-2X/6-311++G (2d, 2p) at 298.15K and 101.3KPa.

| Reactions/n/ $\Delta G$                              |                                                  |                                     |
|------------------------------------------------------|--------------------------------------------------|-------------------------------------|
| SA·AM·W <sub>n-1</sub> +W→SA·AM·W <sub>n</sub>       | SA+AM+nW→SA·AM·(W) <sub>n</sub>                  |                                     |
|                                                      | <i>n</i> = 0, $\Delta G$ = -7.98                 |                                     |
| <i>n</i> = 1, $\Delta G$ = -2.6                      | <i>n</i> = 1, $\Delta G$ = -10.61                |                                     |
| <i>n</i> = 2, $\Delta G$ = -2.2                      | <i>n</i> = 2, $\Delta G$ = -12.80                |                                     |
| <i>n</i> = 3, $\Delta G$ = -1.9                      | <i>n</i> = 3, $\Delta G$ = -14.70                |                                     |
| <i>n</i> = 4, $\Delta G$ = -3.3                      | <i>n</i> = 4, $\Delta G$ = -18.02                |                                     |
| SA·AM·CA·W <sub>n-1</sub> +W→SA·AM·CA·W <sub>n</sub> | SA·AM·W <sub>n</sub> +CA→SA·AM·CA·W <sub>n</sub> | SA+AM+CA+nW→SA·AM·CA·W <sub>n</sub> |
|                                                      | <i>n</i> = 0, $\Delta G$ = -8.45                 | <i>n</i> = 0, $\Delta G$ = -16.42   |
| <i>n</i> = 1, $\Delta G$ = -2.7                      | <i>n</i> = 1, $\Delta G$ = -8.52                 | <i>n</i> = 1, $\Delta G$ = -19.13   |
| <i>n</i> = 2, $\Delta G$ = -1.4                      | <i>n</i> = 2, $\Delta G$ = -7.74                 | <i>n</i> = 2, $\Delta G$ = -20.54   |
| <i>n</i> = 3, $\Delta G$ = -1.6                      | <i>n</i> = 3, $\Delta G$ = -7.47                 | <i>n</i> = 3, $\Delta G$ = -22.17   |
| <i>n</i> = 4, $\Delta G$ = -1.1                      | <i>n</i> = 4, $\Delta G$ = -5.26                 | <i>n</i> = 4, $\Delta G$ = -23.29   |
| SA·DMA·W <sub>n-1</sub> +W→SA·DMA·W <sub>n</sub>     | SA+DMA+nW→SA·DMA·(W) <sub>n</sub>                |                                     |
|                                                      | <i>n</i> = 0, $\Delta G$ = -11.22                |                                     |
| <i>n</i> = 1, $\Delta G$ = -4.9                      | <i>n</i> = 1, $\Delta G$ = -16.07                |                                     |
| <i>n</i> = 2, $\Delta G$ = -3.3                      | <i>n</i> = 2, $\Delta G$ = -19.34                |                                     |
| <i>n</i> = 3, $\Delta G$ = -2.0                      | <i>n</i> = 3, $\Delta G$ = -21.34                |                                     |

|                                                            |                                                                                             |                                                                 |     |
|------------------------------------------------------------|---------------------------------------------------------------------------------------------|-----------------------------------------------------------------|-----|
| $n = 4, \Delta G = -1.7$                                   | $n = 4, \Delta G = -23.02$                                                                  |                                                                 |     |
| $SA \cdot DMA \cdot CA \cdot W_n$                          | $SA \cdot DMA \cdot W_n + CA \rightarrow SA \cdot DMA \cdot CA \cdot W_n$                   | SA+                                                             | DMA |
| $1+W \rightarrow SA \cdot DMA \cdot CA \cdot W_n$          |                                                                                             | $+CA+nW \rightarrow SA \cdot DMA \cdot CA \cdot (W)_n$          |     |
|                                                            | $n = 0, \Delta G = -13.45$                                                                  | $n = 0, \Delta G = -24.67$                                      |     |
| $n = 1, \Delta G = \mathbf{0.83}$                          | $n = 1, \Delta G = -7.77$                                                                   | $n = 1, \Delta G = -23.84$                                      |     |
| $n = 2, \Delta G = -1.7$                                   | $n = 2, \Delta G = -6.18$                                                                   | $n = 2, \Delta G = -25.52$                                      |     |
| $n = 3, \Delta G = -3.4$                                   | $n = 3, \Delta G = -7.55$                                                                   | $n = 3, \Delta G = -28.89$                                      |     |
| $n = 4, \Delta G = \mathbf{0.26}$                          | $n = 4, \Delta G = -5.61$                                                                   | $n = 4, \Delta G = -28.63$                                      |     |
| $SA \cdot AM \cdot DMA \cdot W_n$                          | $SA + AM + DMA + nW \rightarrow SA \cdot AM \cdot DMA \cdot (W)_n$                          |                                                                 |     |
| $1+W \rightarrow SA \cdot AM \cdot DMA \cdot W_n$          |                                                                                             |                                                                 |     |
|                                                            | $n = 0, \Delta G = -15.49$                                                                  |                                                                 |     |
| $n = 1, \Delta G = -3.4$                                   | $n = 1, \Delta G = -18.86$                                                                  |                                                                 |     |
| $n = 2, \Delta G = -2.0$                                   | $n = 2, \Delta G = -20.83$                                                                  |                                                                 |     |
| $n = 3, \Delta G = -3.2$                                   | $n = 3, \Delta G = -23.98$                                                                  |                                                                 |     |
| $n = 4, \Delta G = -3.0$                                   | $n = 4, \Delta G = -26.98$                                                                  |                                                                 |     |
| $SA \cdot AM \cdot DMA \cdot CA \cdot W_n$                 | $SA \cdot AM \cdot DMA \cdot W_n + CA \rightarrow SA \cdot AM \cdot DMA \cdot CA \cdot W_n$ | SA+      AM      +      DMA                                     |     |
| $1+W \rightarrow SA \cdot AM \cdot DMA \cdot CA \cdot W_n$ |                                                                                             | $+CA+nW \rightarrow SA \cdot AM \cdot DMA \cdot CA \cdot (W)_n$ |     |
|                                                            | $n = 0, \Delta G = -10.24$                                                                  | $n = 0, \Delta G = -25.73$                                      |     |
| $n = 1, \Delta G = \mathbf{1.81}$                          | $n = 1, \Delta G = -5.06$                                                                   | $n = 1, \Delta G = -23.91$                                      |     |
| $n = 2, \Delta G = -4.4$                                   | $n = 2, \Delta G = -7.49$                                                                   | $n = 2, \Delta G = -28.32$                                      |     |
| $n = 3, \Delta G = \mathbf{1.61}$                          | $n = 3, \Delta G = -2.74$                                                                   | $n = 3, \Delta G = -26.72$                                      |     |
| $n = 4, \Delta G = -2.6$                                   | $n = 4, \Delta G = -2.33$                                                                   | $n = 4, \Delta G = -29.31$                                      |     |
